# Supplementary material for: Ferroelectric origin in one-dimensional undoped ZnO towards high electromechanical response
Source: Royal Society of Chemistry journal article supplement (doi:10.1039/c5ce02262b), 2015-12-10
Supplement: c5ce02262b1.pdf [file c5ce02262b1.pdf]

# Ferroelectric origin in one-dimensional undoped ZnO towards high electromechanical response<sup>†</sup>

Moumita Ghosh<sup>a,b,c,\*</sup>, Siddharth Ghosh<sup>d</sup>, Michael Seibt<sup>c</sup>, K. Yellaeswara Rao<sup>b</sup>, Patrick Peretzki<sup>c</sup> and G. Mohan Rao<sup>b</sup>

<sup>a</sup> *Centre for Nano Science and Engineering, Indian Institute of Science, Bangalore, 560012, Karnataka, India.*

<sup>b</sup> *Department of Instrumentation and Applied Physics, Indian Institute of Science, Bangalore, 560012, Karnataka, India.*

<sup>c</sup> *IV<sup>th</sup> Institute of Physics, Georg-August-Universität-Göttingen, Friedrich-Hund-Platz 1, Göttingen, 37077, Germany.*

<sup>d</sup> *III<sup>rd</sup> Institute of Physics, Georg-August-Universität-Göttingen, Friedrich-Hund-Platz 1, Göttingen, 37077, Germany.*

\**ghoshiisc@gmail.com*

## SUPPORTING INFORMATION

### 1 Seed layer

The 30 nm ZnO seed layer was sputtered on Pt/Si substrate. Table 1 shows the process parameters for ZnO seed layer preparation.

Table 1: *Process parameters in ZnO seed layer preparation*

| Parameters                   |                            |
|------------------------------|----------------------------|
| RF power                     | 100 watt                   |
| Chamber pressure             | 4.5x 10 <sup>-2</sup> mbar |
| Argon flow                   | 25 sccm                    |
| Substrate to target distance | 5 cm                       |
| Deposition time              | 4 minutes                  |
| Thickness                    | 30 nm                      |

## 2 Polarization-electric field loop (P-E loop)

We have used a modified Sawyer Tower circuit and a digital oscilloscope display (TDS1000-EDU, Tektronix, Canada, US) to verify ferroelectric property of the samples. Schematic of modified Sawyer Tower circuit [1, 2] used in our experiment is presented in Fig. 1. Using this, ferroelectric material is characterized under AC electric field. In conventional Sawyer Tower circuit current through the sample under test consists of polarization current, leakage current and stray capacitance. Presence of stray current distorts the P-E hysteresis loop whereas presence of leakage current does not give a closed hysteresis loop. In this experiment, the Sawyer Tower circuit is modified by adding two network blocks to reduce the effect of leakage current and stray current on polarization current. These two network blocks are a current booster network and a phase shifter network. Fig. 1 shows these two network blocks and their detailed circuitry (below). The current booster network amplifies the input current signal. It consists of two stages; a voltage unity gain inverting operational-amplifier (op-amp) circuit and a NPN-PNP transistor current amplifier circuit. The voltage inverter inverts input voltage signal at the op-amp output terminal without changing its amplitude whereas the current amplifier amplifies input current signal from the op-amp output terminal. Output current signal from the amplifier stage is fed to the phase shifter network block. This block consists of six sub-blocks of resistor-capacitor (R-C) networks in series where in each sub-block resistor and capacitor are connected in parallel to each other (Fig. 1). Each of the R-C network shifts input current signal (out of the NPN-PNP network) phase by  $30^\circ$ . So, the total phase shifter block shifts input current signal phase by  $180^\circ$ . When this phase shifted current signal (-stray current and -leakage current) is added to the output current signal of the sample (polarization current+stray current+leakage current) under test, effect of stray current and leakage current on polarization current gets reduced.

Here, a function generator (F) generates AC voltage signal  $V_{app}$ . The voltage is fed to the current booster block to have sufficient current (for amplifying current signal) to drive the load. Output signal from current booster network is divided into three parts; one of them (drawing major portion of the current signal) is fed to the ferroelectric capacitor ( $C_f$ ) under investigation whereas other two are fed to the phase shifter network and the voltage attenuating network respectively. Voltage ( $V_0$ ) across a reference capacitor ( $C_0$ , generally with higher capacitance value

than  $C_f$ ) which is in series with  $C_f$  is recorded and displayed in digital oscilloscope. X-axis of the display denotes attenuated applied AC voltage obtained from attenuator network (which contains mainly voltage divider) and Y-axis gives corresponding change in  $V_0$  as well as the charge in  $C_0$ . As  $C_0$  and  $C_f$  are in series, charge stored in both the capacitors will be the same (i.e.,  $Q_f=C_fV_f=Q_0=C_0V_0$ ,  $V_f > V_0$  as  $C_0 > C_f$ ). So, the Y-axis will give charge as well as polarization behavior in  $C_f$  with respect to the attenuated applied AC (or electric field). Theoretically, as  $C_0$  has larger capacitance than  $C_f$ , the voltage  $V_0$  across it will be very small with respect to  $V_f$ . So,  $V_f$  will be almost equal to  $V_{app}$ . Thus,  $V_{app}$  gives the electric field inside  $C_f$ . Different values of capacitor starting from 10 nF to 1  $\mu$ F are selected as  $C_0$  by switch 2 (SW2). To reduce the effect of stray capacitance and leakage current on polarization, a compensation network has been introduced in Sawyer Tower circuit. Inverting operational amplifier in this network inverts  $V_{app}$  and in the next stage R-C ( $R_2$ - $C_1$ ) network generates reverse phase stray current and leakage current. Integration of these at  $C_f$  and  $C_0$  junction gives only the effect of polarization current in the output terminal.  $R_2$  and  $C_1$  values used in this experiment are varied from 10 M $\Omega$  to 1 K $\Omega$  and 10 nF to 1  $\mu$ F, respectively. A selector (SW1) was used to select combinations of  $R_2$  and  $C_1$ . The op-amp buffer network provides high impedance match in between the output terminal and display. Table 2, 3 and 4 have detailed about the necessary electronic components that were used in the modified Sawyer Tower circuit. The derived electronic component values mentioned here are calculated using the equations for current booster phase shifter network as shown in Fig. 1. Fig. 2 demonstrates the experimental setup of modified Sawyer Tower circuit along with oscilloscope display, used here for ferroelectric characterization. So, the Sawyer Tower circuit gives information about the polarization of ferroelectric material with respect to the electric field in it. Electric polarization with respect to electric field (P-E characterization [3]) gives different patterns for different electrical elements. For ideal linear capacitor, it gives a straight line (Fig. 3 i) while for an ideal resistor it gives a homogeneous oval (Fig. 3 ii). In case of a practical capacitor, resistive loss is always present, so the P-E response looks like a tilted oval (Fig. 3 iii). For an ideal ferroelectric material, nonlinear hysteresis can be observed in P-E response loop (Fig. 3 iv).

Table 2: *Parameters for function generator*

| Input voltage | Signal frequency | Coupling capacitor | Impedance<br>$Z_c = 1/(2\pi f C_c)$ |
|---------------|------------------|--------------------|-------------------------------------|
| V             | Hz               | $\mu$ F            | $\Omega$                            |
| 5.5 $V_{P-P}$ | 400              | 30                 | 130.8                               |

Table 3: *Parameters for current booster network*

| $R_1$      | $R_4$      | $R_5$      | $R_{bn}$   | $R_{cn}$   | $R_{en}$   | $R_{bp}$   | $R_{cp}$   | $R_{ep}$   |
|------------|------------|------------|------------|------------|------------|------------|------------|------------|
| K $\Omega$ |
| 10         | 2          | 1          | 42         | 0.5        | 0.5        | 42         | 0.5        | 0.5        |

Table 4: *Parameters for phase shifter, attenuator and reference capacitor network*

| $R_2$      | $C_1$ | $R_7$      | $R_3$      | $C_0$ |
|------------|-------|------------|------------|-------|
| M $\Omega$ | pF    | M $\Omega$ | M $\Omega$ | nF    |
| 1          | 220   | 10         | 1          | 8.33  |

As the structure of interest is single crystalline, wurtzite (vertically aligned in-situ sample), the focus will be on this structure only. In a wurtzite [001] directional single crystalline ferroelectric material (having space group  $P6_3mc$ ), [001] is a possible orientation, [4] where permanent dipole moments lie. Dipole moments lying (parallel or antiparallel with each other) in [001] direction create domains with respect to each other. In a single domain, all the dipole moments have same orientation. The parallel or nearly parallel domains with respect to the applied electric field need low energy to get aligned with the electric field. Whereas, domains with 180° alignment with the applied field need more energy for alignment. From the ideal ferroelectric P-E loop in Fig. 3 iv, this can be observed i.e., initial application of electric field arranges the nearly parallel domain walls or boundaries. Increasing electric field arranges the 180° domains, before reaching to a saturation state. The polarization value at saturation is extrapolated to y-axis to give spontaneous polarization value. From saturation, when the electric field is reversed the polarization does not follow the previous path, rather it maintains the saturation polarization value upto the zero applied field. High negative applied field is needed to bring down this polarization value to zero. Further increase in negative electric field, increases polarization in negative direction until the negative polarization reaches to satura-

tion. Again increment of electric field towards positive direction, holds the negative saturation polarization until electric field becomes zero. High positive electric field is required to nullify this negative polarization. The electric field values which bring down the positive and negative polarization to zero are called coercive field ( $\pm E_c$ ). The remaining polarization in the material at zero electric field is called remnant polarization. Ideally remnant polarization and spontaneous polarization have same values. Spontaneous polarization is related to electric field by,

$$D = P_s + \varepsilon_0 \varepsilon_r E \quad (1)$$

where  $D$  is the electric displacement ( $C/m^2$ ),  $\varepsilon_0$  is the dielectric permittivity of free space ( $F/m$ ),  $\varepsilon_r$  is the relative dielectric permittivity ( $F/m$ ),  $E$  is the applied electric field ( $V/m$ ) and  $P_s$  is the spontaneous polarization ( $C/m^2$ ). When electric field is zero,  $D=P_s$ . So, in a single domain ferroelectric material at zero electric field  $D$  has two values either positive or negative depending upon the direction of spontaneous polarization and in a multi-domain ferroelectric material  $D$  lies in between these positive and negative spontaneous polarization values. From P-E loop of ferroelectric material, spontaneous polarization and applied electric field is given by:

$$P_s = Q/A = (C_0 V_0)/A \quad (2)$$

$$E = V_{app}/d_a \quad (3)$$

where  $A$  is the area ( $m^2$ ) and  $d_a$  is the thickness ( $m$ ) of the ferroelectric material. Remnant polarization and applied electric field of this sample is determined using equation 2 and equation 3. Here,  $A = \pi(250\mu m/2)^2$ . In ZnO nanorod sample, the  $C_0$  value used in modified Sawyer Tower circuit was 8.33 nF and output voltage across  $C_0$  was 0.5 volt (as observed from oscilloscope).

### 3 SEM of ZnO nanorod cross-section

SEM image of a single ZnO nanorod cross-section is shown in Fig. 4. This ZnO nanorod has hexagonal cross-section which is 50 nm in diameter. Schematic of this hexagonal cross-section shows [100] and [110] directions considering three lattice vectors  $a_1$ ,  $a_2$  and  $a_3$  in hexagonal wurtzite structure.

## References

- [1] Sawyer, C. B.; Tower, C. H. *Phys. Rev.* 1930, 35, 269.
- [2] Das, S. C.; Shahee, A.; Lalla, N. P.; Shripathi, T. *Proceedings of the 54th DAE Solid State Physics Symposium 2009*, 54, 439.
- [3] Damjanovic, D. *Rep. Prog. Phys.* 1998, 61, 1267.
- [4] Wood, C.; Jena, D. *Polarization Effects in Semiconductors: From Ab Initio Theory to Device Applications*; Springer, 2007.

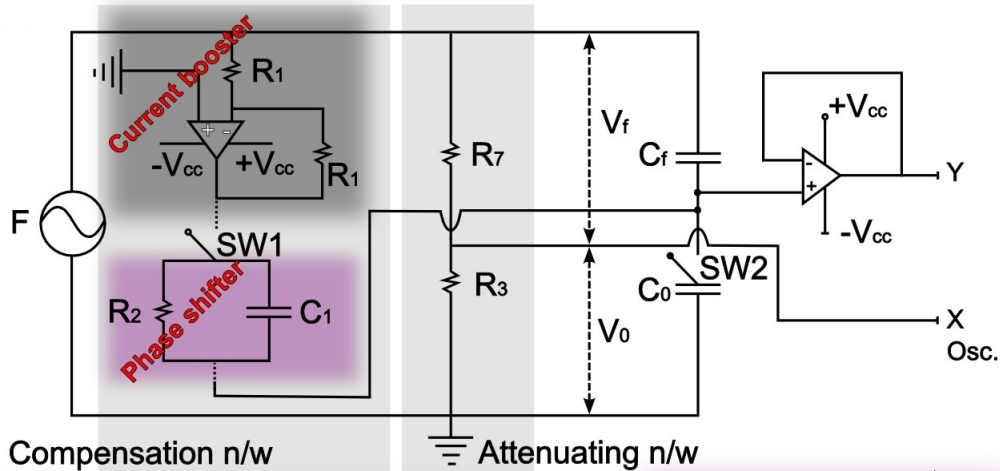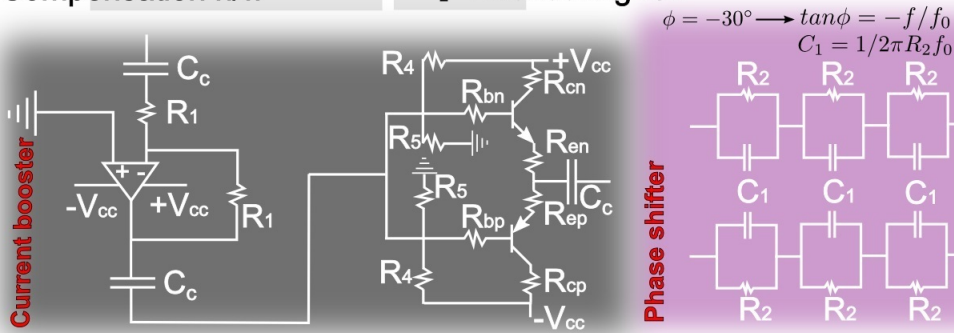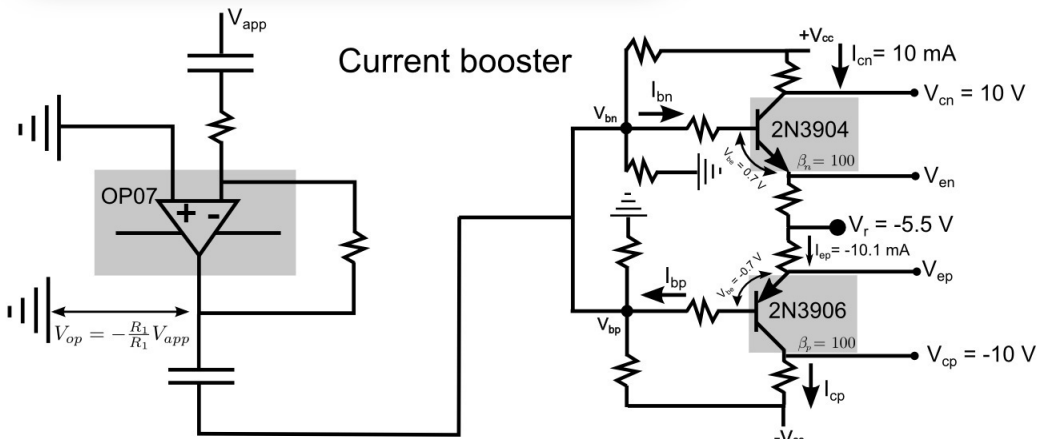

For 2N3904

- $\frac{+V_{cc} - V_{cn}}{I_{cn}} = R_{cn}$
- $I_{en} = \frac{\beta_n + 1}{\beta_n} I_{cn}$
- $V_{en} = -V_{ben2} = V_{ben1} + V_T \ln\left(\frac{I_{cn1}}{I_{cn2}}\right)$
- $R_{en} = \frac{V_{cn} - V_r}{I_{en}}$
- $I_{bn} = I_{en} - I_{cn}$
- $V_{bn} = \frac{R_5}{R_5 + R_4} V_{cc}$
- $R_{bn} = \frac{V_{bn} - V_{ben2}}{I_{bn}}$

For 2N3906

- $V_{bp} = \frac{R_5}{R_5 + R_4} (-V_{cc})$
- $V_{ep} = -V_{bep} + V_{bp}$
- $I_{cp} = \frac{\beta_p}{\beta_p + 1} I_{ep}$
- $I_{cp} = I_{ep} - I_{bp}$
- $R_{bp} = \frac{V_{bp} - V_{bep2}}{I_{bp}}$
- $R_{cp} = \frac{(-V_{cc}) - V_{ep}}{I_{cp}}$

Figure 1: Shows schematic of the modified Sawyer Tower circuit along with circuit design details of the current booster and phase shifter. For the phase shifter,  $f_0$  is the break frequency of each of the six R-C networks.

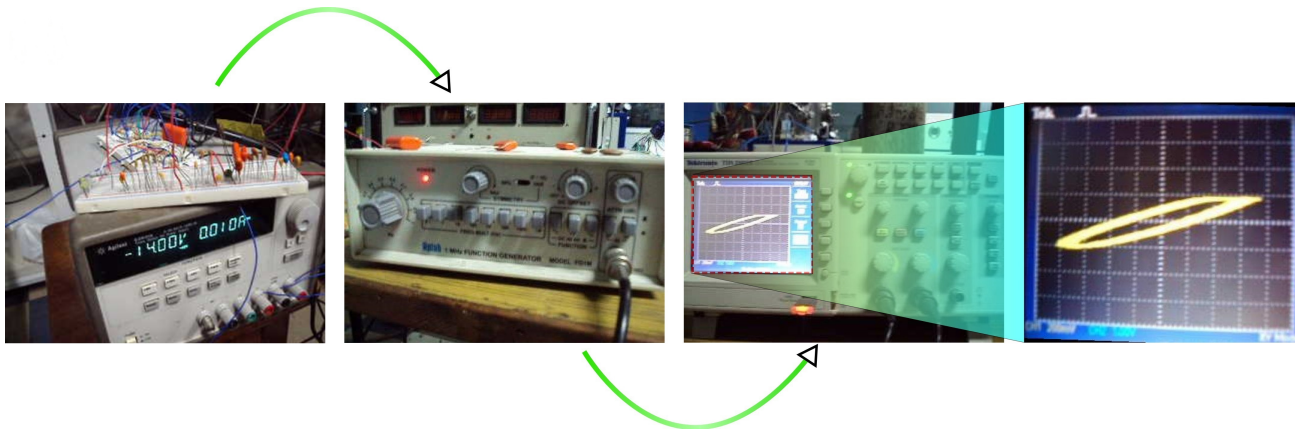

Figure 2: Experimental setup of modified Sawyer Tower circuit.

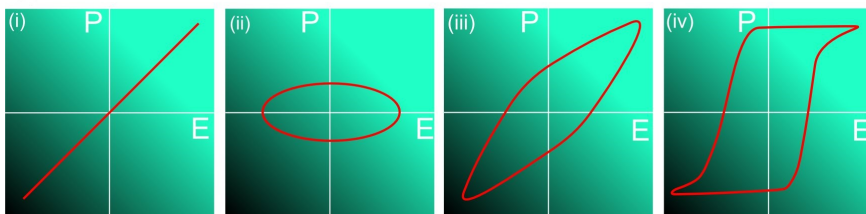

Figure 3: P-E loop of (i) an ideal capacitor, (ii) an ideal resistor, (iii) a lossy capacitor, (iv) an ideal ferroelectric material.

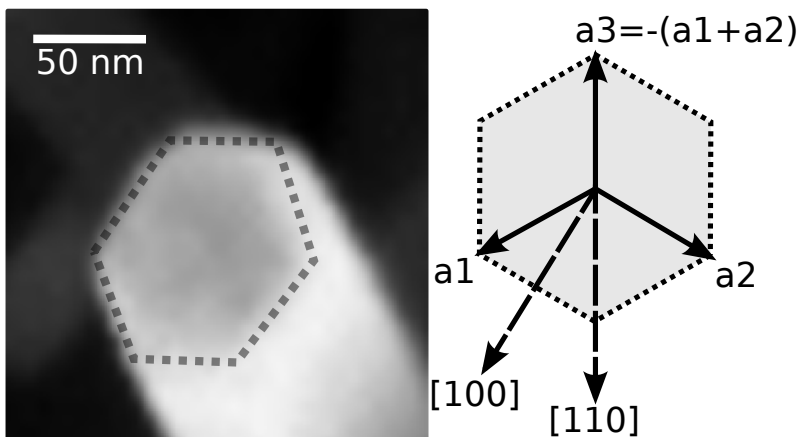

Figure 4: Shows SEM of a single ZnO nanorod with hexagonal cross-section.
